# Supplementary material
Source: PubMed Central journal article supplement (PMC6884132)
Supplement: NIHMS1059528-supplement-suppl.pdf [file NIHMS1059528-supplement-suppl.pdf]

## Supplementary Information

### A Designed Bacterial Microcompartment Shell with Tunable Composition and Precision Cargo Loading

Bryan Ferlez, Markus Sutter, Cheryl A. Kerfeld\*

**Table S1.** X-ray data collection and refinement statistics for CPH

| <b>Data collection<sup>a</sup></b>    |                                  |
|---------------------------------------|----------------------------------|
| Resolution range (Å)                  | 43.8 – 1.61 (1.69-1.61)          |
| Space group                           | P 6 <sub>3</sub> 2 2             |
| Unit cell dimensions                  | 73.5 73.5 119.6 Å<br>90 90 120 ° |
| Total reflections                     | 456,361 (64,426)                 |
| Unique reflections                    | 25,615 (3,633)                   |
| Multiplicity                          | 17.8 (17.7)                      |
| Completeness (%)                      | 99.9 (99.2)                      |
| Mean I/sigma(I)                       | 18.6 (6.5)                       |
| R-merge                               | 0.09 (0.45)                      |
| R-meas                                | 0.09 (0.46)                      |
| CC <sup>1/2</sup>                     | 0.999 (0.973)                    |
| <b>Refinement<sup>a</sup></b>         |                                  |
| Resolution range (Å)                  | 36.8-1.61 (1.67-1.61)            |
| Number of reflections                 | 25444 (2477)                     |
| Number of reflections used for R-free | 1998 (196)                       |
| R-work (%)                            | 20.9 (27.5)                      |
| R-free (%)                            | 24.0 (31.0)                      |
| Number of non-hydrogen atoms          | 1538                             |
| macromolecules                        | 1404                             |
| solvent                               | 134                              |
| Protein residues                      | 197                              |
| RMS (bonds, Å)                        | 0.010                            |
| RMS (angles, °)                       | 0.99                             |
| Ramachandran favored (%)              | 97.4                             |
| Ramachandran allowed (%)              | 2.6                              |
| Ramachandran outliers (%)             | 0                                |
| Clashscore                            | 3.9                              |
| Average B-factor (Å <sup>2</sup> )    | 20.4                             |

<sup>a</sup>Statistics for the highest-resolution shell are shown in parentheses.

**Table S2.** Plasmids used in this study

| Plasmid name | Vector  | Cloning site 1 gene(s)               | Cloning site 2 gene | Cloning site 1 promoter | Cloning site 2 promoter |
|--------------|---------|--------------------------------------|---------------------|-------------------------|-------------------------|
| pBF27        | pET11b  | CPH                                  | N/A                 | T7                      | N/A                     |
| pBF53        | pETDuet | CPH <sub>his6</sub> , T <sub>1</sub> | P <sub>SII</sub>    | T7                      | T7                      |
| pBF64        | pBbA2k  | CPH-GFP <sub>his6</sub>              | N/A                 | Tet                     | N/A                     |
| pBF71        | pBbA2k  | WTH-GFP <sub>his6</sub>              | N/A                 | Tet                     | N/A                     |

**Table S3.** Amino acid sequences of proteins used in this study

| Protein                 | Amino acid sequence                                                                                                                                                                                                                                                                                                                                                                                                                                   | MW (kDa) <sup>a</sup> | Note                                                                                                                                                                       |
|-------------------------|-------------------------------------------------------------------------------------------------------------------------------------------------------------------------------------------------------------------------------------------------------------------------------------------------------------------------------------------------------------------------------------------------------------------------------------------------------|-----------------------|----------------------------------------------------------------------------------------------------------------------------------------------------------------------------|
| CPH                     | MEVVAVHVIPRPHVNVDAALPLGRTPGMDKSAGSGSGSADALGMIE<br>VRGFVGMVEAADAMVKA <del>AK</del> VELIGYEKTGGGYVTAVVRGDVA <del>AVK</del><br>AATEAGQRAAERVG                                                                                                                                                                                                                                                                                                            | 10.5                  |                                                                                                                                                                            |
| CPH <sub>his6</sub>     | (CPH)-GSHHHHHH                                                                                                                                                                                                                                                                                                                                                                                                                                        | 11.5                  |                                                                                                                                                                            |
| T <sub>1</sub>          | MDHAPERFDATPPAGEPDRPALGVLELTSIARGITVADAALKRAPSL<br>LLMSRPVSSGKHLMMRGQVAEVEESMIAAREIAGAGSGALLDELE<br>LPYAHEQLWRFLDAPVVADAW <del>EDTESVIIVETATVCAAIDSADAAL</del><br>KTAPVVLDRMRLAIGIAGKAFFLTGELADVEAAA <del>EVVRE</del> RRCGARLL<br>ELACIARPVDELGRLLFF <u>YRIMLKSNRK</u>                                                                                                                                                                                | 23.2                  | The T <sub>1</sub> sequence contains an additional 10 amino acids (underlined) at the C-terminus due to a single base pair deletion in the stop codon in the pBF53 vector. |
| P <sub>SII</sub>        | MVLGKVVGTVVASRKEPRIEGLSLLLVACDPDGTPTGGAVVCADA<br>VGAGVGEVVL <del>YASGSSARQTEVTNNRPVDATIMAIVDLVEMGGDVR</del><br>FRKDG <del>SWSH</del> PQFEK                                                                                                                                                                                                                                                                                                            | 11.5                  |                                                                                                                                                                            |
| CPH-GFP <sub>his6</sub> | (CPH)-<br>GSGSGSKGEELFTGVVPILVELDGDVNGHKFSVRGE <del>GEDATNGKL</del><br>TLKFICTTGKLPVPWPTLVTTLT <del>YGVQCFARYPDHMKQHDFFSAM</del><br>PEGYVQERTISFKDDGTYKTRAEVKFEGDTLVNRIELK <del>GIDFKEDGNI</del><br>LGHKLEYNFNSHN <del>VYITADKQKNGIKANFKIRHNVEDGSVQLADHYQ</del><br>QNTPIGDGPVLLPDNHYLSTQSVLSKDPNEKRDH <del>MVLL</del> EFVTAAGIT<br>HGMD <del>ELYKGS</del> HHHHHH                                                                                      | 38.4                  |                                                                                                                                                                            |
| WT-GFP <sub>his6</sub>  | MADALGMIEVRGFVGMVEAADAMVKA <del>AK</del> VELIGYEKTGGGYVTAVV<br>RGDVAAVKAATEAGQRAAERVGEVAVHVIPRPHVNVDAALPLGR<br>TPGMDKSAGSGSGSKGEELFTGVVPILVELDGDVNGHKFSVRGE<br>GEDATNGKLT <del>LKFICTTGKLPVPWPTLVTTLT</del> YGVQCFARYPDHMKQ<br>HDFFSAMPEGYVQERTISFKDDGTYKTRAEVKFEGDTLVNRIELK<br>GIDFKEDGNILGHKLEYNFNSHN <del>VYITADKQKNGIKANFKIRHNVEDGS</del><br>VQLADHYQQNTPIGDGPVLLPDNHYLSTQSVLSKDPNEKRDH <del>MVLL</del><br>EFVTAAGITHGMD <del>ELYKGS</del> HHHHHH | 38.0                  |                                                                                                                                                                            |

<sup>a</sup>) Calculated using the ExpASY web server ([web.expasy.org/compute\\_pi/](http://web.expasy.org/compute_pi/))

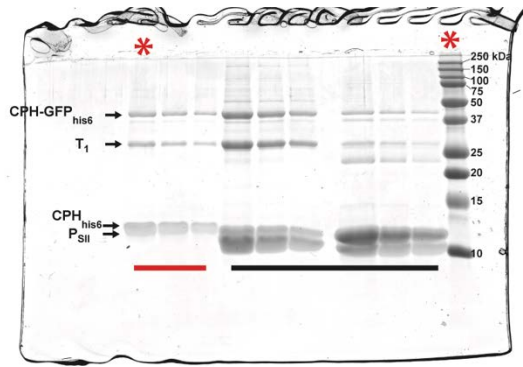

**Figure S1.** Uncropped SDS-PAGE used in Figure 2a. Red asterisks represent lanes displayed in Figure 2a. Red bar denotes different volumes loaded of the same CPH<sub>his6</sub>-T<sub>1</sub>-P<sub>SII</sub>/CPH-GFP<sub>his6</sub> sample. Black bar denotes samples not relevant to this study.

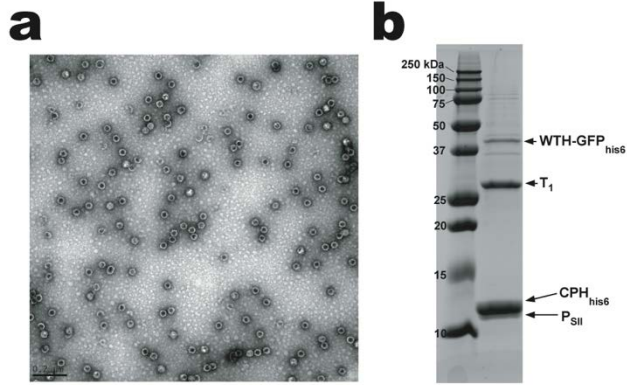

**Figure S2.** Characterization of CPH<sub>his6</sub>-T<sub>1</sub>-P<sub>SII</sub>/WTH-GFP<sub>his6</sub> shells used for CPA assays (Figure 3b, bottom). a) TEM micrograph and b) SDS-PAGE of purified shells. Scale bar is 0.2  $\mu$ m in (a).

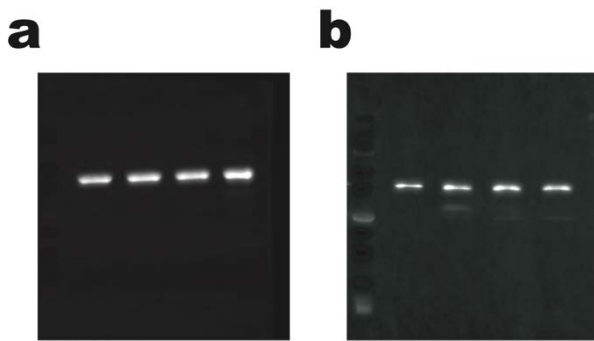

**Figure S3.** Uncropped in-blot intrinsic GFP fluorescence images from a) Figure 3b, top and b) Figure 3b, bottom used to confirm equal loading across wells.

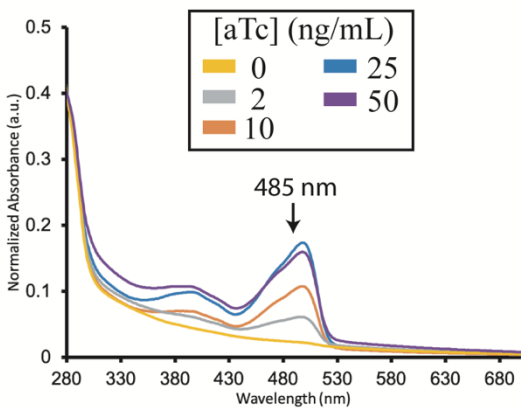

**Figure S4.** UV-vis spectra from purified CPH<sub>his6</sub>-T<sub>1</sub>-P<sub>SII</sub>/CPH-GFP<sub>his6</sub> shells. Spectra normalized to total protein content at 280 nm.
